# Supplementary material for: The fabrication of hollow ZrO2nanoreactors encapsulating Au–Fe2O3dumbbell nanoparticles for CO oxidation
Source: Royal Society of Chemistry journal article supplement (doi:10.1039/d1nr00173f), 2021-01-01
Supplement: d1nr00173f1.pdf [file d1nr00173f1.pdf]

## Supporting Information

### Fabrication of Hollow $\text{ZrO}_2$ Nanoreactors Encapsulating Au- $\text{Fe}_2\text{O}_3$ Dumbbell Nanoparticles for CO Oxidation

Fan Yang,<sup>a</sup> Chunzheng Wu,<sup>b</sup> Hongbo Yu,<sup>\*a</sup> Shiwei Wang,<sup>a</sup> Tong Li,<sup>a</sup> Bo Yan<sup>a</sup> and Hongfeng Yin<sup>\*a</sup>

<sup>a</sup> Ningbo Institute of Materials Technology and Engineering, Chinese Academy of Sciences, 1219 Zhongguan West Road, Ningbo, Zhejiang 315201, P. R. China

<sup>b</sup> College of Sciences, Zhejiang A&F University, Hangzhou, Zhejiang 311300, P.R. China

\* Corresponding author: E-mail: yinhf@nimte.ac.cn; Fax: +86 0574 8668 5043

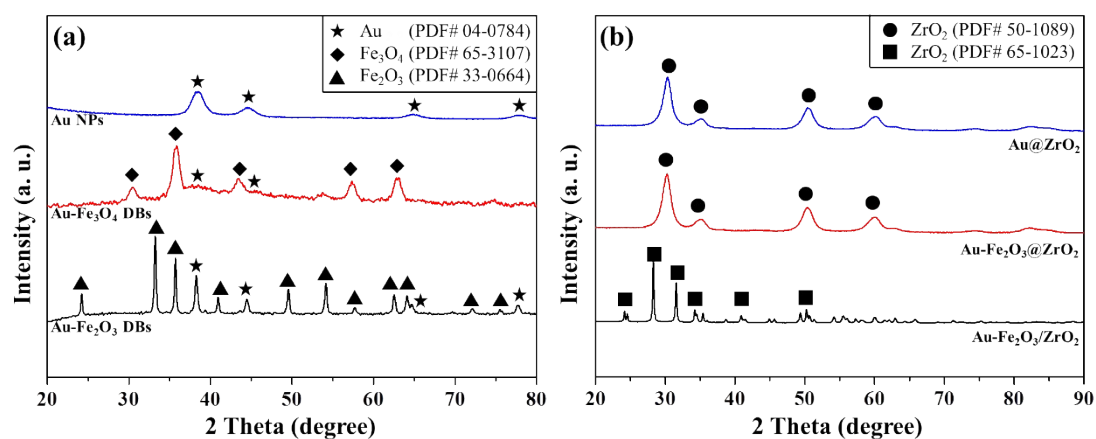

**Fig. S1** XRD diffraction patterns of (a) Au NPs, Au- $\text{Fe}_3\text{O}_4$  DBs, and Au- $\text{Fe}_2\text{O}_3$  DBs obtained by calcination of Au- $\text{Fe}_3\text{O}_4$  at 700 °C; (b) Au@ $\text{ZrO}_2$ , Au- $\text{Fe}_2\text{O}_3$ @ $\text{ZrO}_2$  and Au- $\text{Fe}_2\text{O}_3$ / $\text{ZrO}_2$  catalysts.

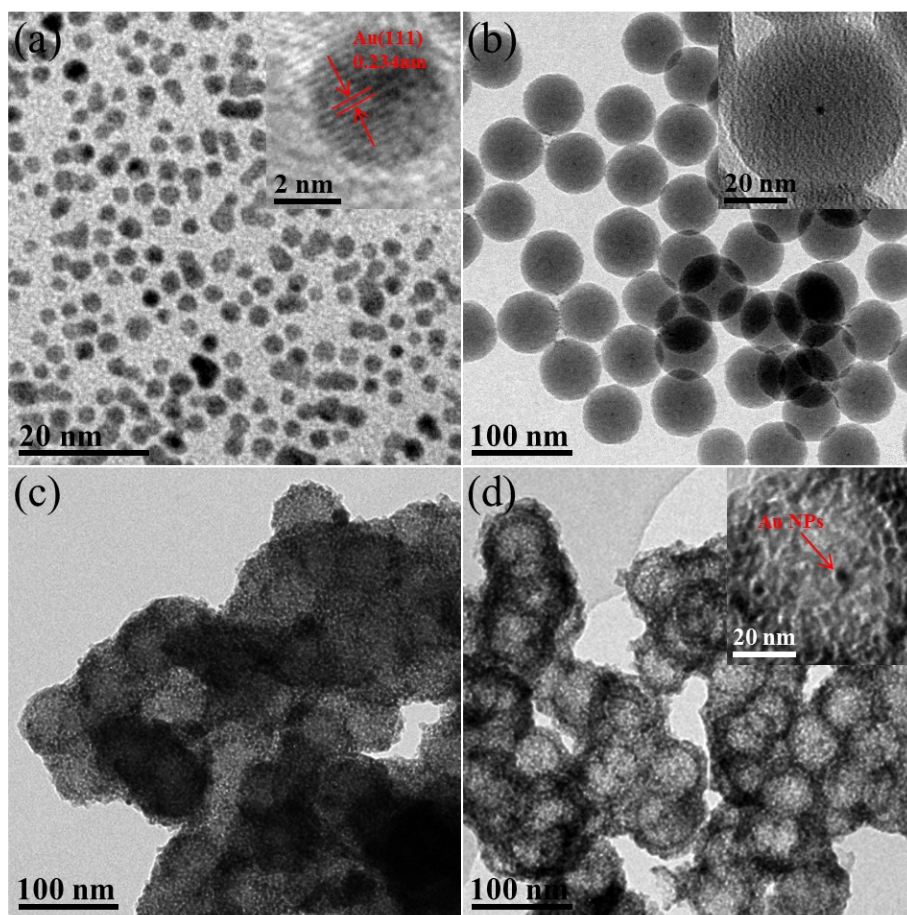

**Fig. S2** TEM images show (a) Au NPs, (b) Au@SiO<sub>2</sub>, (c) Au@SiO<sub>2</sub>@ZrO<sub>2</sub>, (d) Au@ZrO<sub>2</sub> yolk-shell nanoreactors. The insert of (a) show the HRTEM images of Au NPs with scale of 2 nm and TEM images of Au@SiO<sub>2</sub> and Au@ZrO<sub>2</sub> yolk-shell NPs with scales of 20 nm are shown in the insert of (b) and (d), respectively.

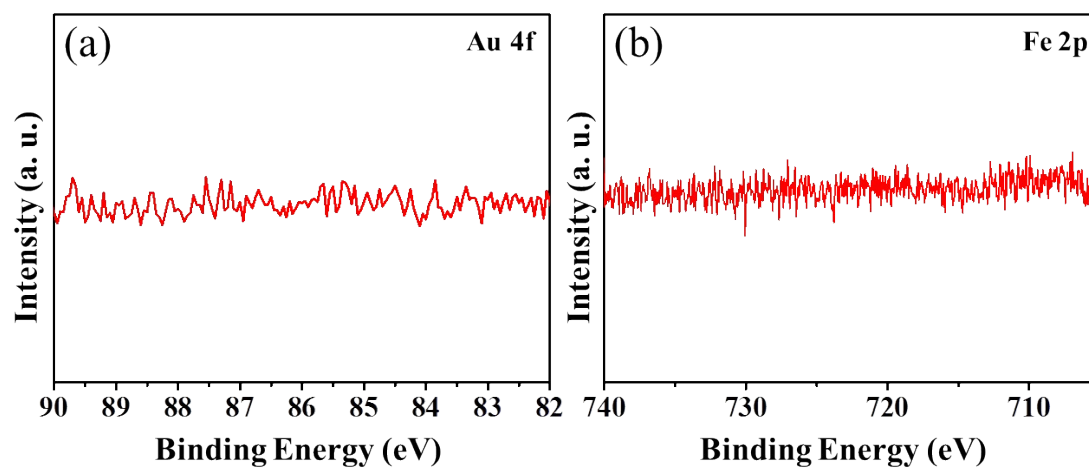

**Fig. S3** (a) Au 4f spectra for Au-Fe<sub>2</sub>O<sub>3</sub>@ZrO<sub>2</sub> nanoreactors; (b) Fe 2p spectra for Au-Fe<sub>2</sub>O<sub>3</sub>@ZrO<sub>2</sub> nanoreactors.

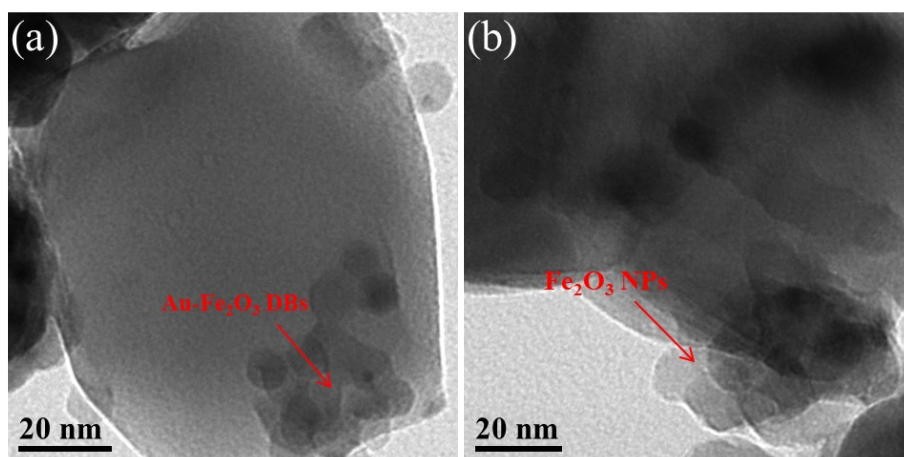

**Fig. S4** TEM images show (a) Au-Fe<sub>2</sub>O<sub>3</sub>/ZrO<sub>2</sub> and (b) Fe<sub>2</sub>O<sub>3</sub>/ZrO<sub>2</sub> supported catalysts.

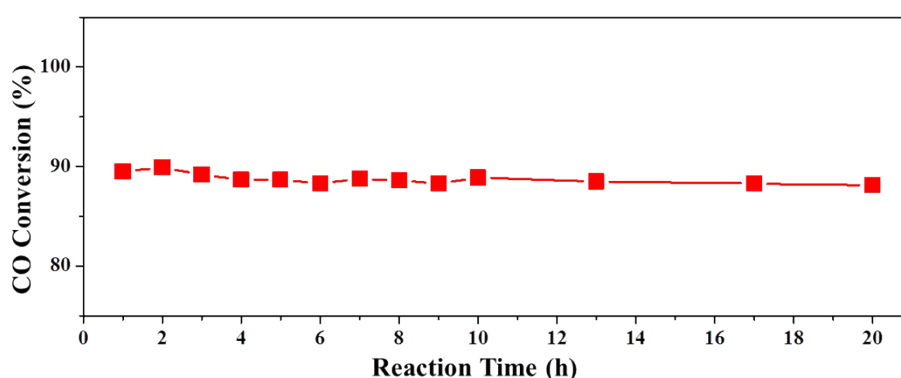

**Fig. S5** Long-term stability of CO oxidation over Au-Fe<sub>2</sub>O<sub>3</sub>@ZrO<sub>2</sub> yolk-shell nanoreactors.

**Table S1** Physical properties and catalytic performance of Au catalysts.

| Cat.                                                | Au loading/wt. % | Au d/nm | T <sub>50</sub> /°C | TOF/h <sup>-1</sup> | Ref.      |
|-----------------------------------------------------|------------------|---------|---------------------|---------------------|-----------|
| Au-Fe <sub>2</sub> O <sub>3</sub> @ZrO <sub>2</sub> | 0.1              | 2.5     | ~ 85                | 1099.16             | This work |
| Au/TiO <sub>2</sub>                                 | 1.0              | 3.8     | -6                  | 334.15              | S1        |
| Au/Fe <sub>2</sub> O <sub>3</sub>                   | 3.7              | 2.7     | -16                 | 64.17               | S2        |
| Au/Ni <sub>0.05</sub> Al                            | 3                | 2.4     | 13                  | 281.39              | S3        |
| Au/TiO <sub>2</sub> @ZrO <sub>2</sub>               | 7.5              | 8       | 60                  | 375.18              | S4        |
| Au@CeO <sub>2</sub>                                 | 0.93             | 17      | 80                  | 1205.5              | S5        |
| Au@ZrO <sub>2</sub>                                 | 6.8              | 14      | 150                 | 724.15              | S6        |
| Au/ZnO                                              | 3.8              | 1.7     | <-90                | 39.34               | S7        |
| Au/α-Fe <sub>2</sub> O <sub>3</sub>                 | 1.86             | 2.3     | <20                 | 543.67              | S8        |
| Au-CeO <sub>2</sub> @ZrO <sub>2</sub>               | 0.55             | 15      | 200                 | 19185.39            | S9        |

TOF ≈ r (CO conversion) • d (Au diameter)<sup>S1</sup>

r (CO conversion) defined as moles of CO converted per mol of total Au per hour at T<sub>50</sub>.

## References

- S1 W. Zhan, Q. He, X. Liu, Y. Guo, Y. Wang, L. Wang, Y. Guo, A. Y. Borisevich, J. Zhang, G. Lu and S. Dai, *J. Am. Chem. Soc.*, 2016, **138**, 16130-16139.
- S2 K. F. Zhao, B. T. Qiao, J. H. Wang, Y. J. Zhang and T. Zhang, *Chem. Commun.*, 2011, **47**, 1779-1781.
- S3 R. Lu, L. He, Y. Wang, X. Q. Gao and W. C. Li, *Chinese J. Catal.*, 2020, **41**, 350-356.
- S4 R. Guttel, M. Paul and F. Schuth, *Catal. Sci. Technol.*, 2011, **1**, 65-68.
- S5 J. Qi, J. Chen, G. D. Li, S. X. Li, Y. Gao and Z. Y. Tang, *Energ. Environ. Sci.*, 2012, **5**, 8937-8941.
- S6 C. Galeano, R. Guttel, M. Paul, P. Arnal, A. H. Lu and F. Schuth, *Chem-Eur. J.*, 2011, **17**, 8434-8439.
- S7 T. Fujita, T. Ishida, K. Shibamoto, T. Honma, H. Ohashi, T. Murayama and M. Haruta, *Acs Catal.*, 2019, **9**, 8364-8372.
- S8 Q. W. Han, D. Y. Zhang, J. L. Guo, B. L. Zhu, W. P. Huang and S. M. Zhang, *Nanomaterials*, 2019, **9**, 1118-1132.
- S9 V. Evangelista, B. Acosta, S. Miridonov, E. Smolentseva, S. Fuentes and A. Simakov, *Appl. Catal. B-Environ.*, 2015, **166**, 518-528.
